1 **Biotrophic interactions disentangled: *In situ* localisation of mRNAs to decipher plant and**  
2 **algal pathogen – host interactions at the single cell level.**

3  
4 Julia Badstöber<sup>1</sup>, Claire M. M. Gachon<sup>2</sup>, Jutta Ludwig-Müller<sup>3</sup>, Adolf M. Sandbichler<sup>4</sup>, Sigrid  
5 Neuhauser<sup>1</sup>

6  
7 <sup>1</sup>Institute of Microbiology, University of Innsbruck, A-6020 Innsbruck, Austria

8 <sup>2</sup>The Scottish Association for Marine Science, Scottish Marine Institute, Oban PA37 1QA, UK

9 <sup>3</sup>Institute of Botany, Technische Universität Dresden, D-01217 Dresden, Germany

10 <sup>4</sup>Institute of Zoology, University of Innsbruck, A-6020 Innsbruck, Austria

11  
12 Author for correspondence:

13 *Sigrid Neuhauser*

14 *Tel: +43 (0) 512 507-51259*

15 *Email: [Sigrid.Neuhauser@uibk.ac.at](mailto:Sigrid.Neuhauser@uibk.ac.at)*

16  
17 **Summary**

18  
19 Plant-pathogen interactions follow spatiotemporal developmental dynamics where gene  
20 expression in pathogen and host undergo crucial changes. It is of great interest to detect,  
21 quantify and localise where and when key genes are active or inactive. Here, we adapt  
22 single molecule FISH techniques to demonstrate presence and activity of mRNAs using  
23 phytomyxids in their plant and algal host from laboratory and field materials. This  
24 allowed to monitor and quantify the expression of genes from the clubroot pathogen  
25 *Plasmodiophora brassicae*, several species of its *Brassica* hosts, and of several brown  
26 algae, including the genome model *Ectocarpus siliculosus*, infected with the  
27 phytomyxid *Maullinia ectocarpii*. We show that mRNAs are localised along a  
28 spatiotemporal gradient, thus providing proof-of-concept of the usefulness of these  
29 methods. These methods are easily adaptable to any interaction between microbes and  
30 their algal or plant host, and have the potential to increase our understanding of  
31 processes underpinning complex plant-microbe interactions.

32  
33  
34 **Key words:** biotroph, mRNA localisation, Phaeophyceae, Phytomyxea, plant pathogen  
35 interactions, RCA FISH, single cell biology, single molecule FISH.

## 37 Introduction

38  
39 Thanks to a series of technological advances over the last years, it has become clear that many  
40 biological processes within and between organisms are best studied at the single cell level (e.g.  
41 Libault *et al.*, 2017; Moor & Itzkovitz, 2017). Single cell approaches provide a revolutionary  
42 toolset to study interactions, especially the complex intermingled crosstalk between biotrophic  
43 pathogens and their algal or plant hosts, when they cannot be grown outside of the host and/or  
44 are not amenable to genetic modifications. Biotrophs keep their host's cells alive during their  
45 development and growth and therefore, have evolved a multitude of strategies to escape  
46 detection but to still obtain nutrients or water from their host (Kemen & Jones, 2012; Zeilinger  
47 *et al.*, 2016). In such interactions, timing is crucial: the pathogen first needs to escape the host  
48 defence while establishing itself, but in a subsequent step the pathogen and host communicate  
49 about nutrients to be exchanged. Hence, gene expression changes rapidly at the cellular level,  
50 and can differ between neighbouring cells (Buxbaum *et al.*, 2015). Unless they are combined  
51 with expensive or time-consuming techniques such as laser-assisted microdissection (Schuller  
52 *et al.*, 2014), widely used methods such as qPCR or RNAseq. These are not able to account for  
53 spatial and temporal heterogeneity between the cells, and therefore are impracticable to study  
54 single-cell changes at the scale of organs or macro-organisms. However, transformation or  
55 genetic manipulation remains inaccessible for a wide range of pathogens or hosts, especially  
56 those that cannot be grown in the laboratory and/or for which only very limited genetic  
57 information is available (Libault *et al.*, 2017). Furthermore, current work on plant and algal  
58 microbiomes makes increasingly clear that functional studies require to take into account  
59 complex microbial communities which include a huge diversity of „non-model“ organisms,  
60 many of which are not accessible to culturing or genome amendment techniques (Egan *et al.*,  
61 2013; Vandenkoornhuyse *et al.*, 2015; Müller *et al.*, 2016). Also, the specific developmental  
62 stages of pathogens within their hosts should be taken into account. Thus, descriptive  
63 approaches such as FISH (Fluorescence In Situ Hybridisation) have a renewed potential to start  
64 exploring these communities functionally.

65 Indeed, most single-cell approaches available currently lack the potential to be used routinely  
66 outside of model organisms to study the dynamic transcriptomic changes of single cells. One  
67 notable exception is the *in situ* localisation of individual mRNAs via FISH (Wang & Bodovitz,  
68 2010; Misra *et al.*, 2014; Libault *et al.*, 2017). FISH techniques have been utilised to study gene  
69 expression patterns and the distribution of mRNA genes in human cell lines (Weibrecht *et al.*,  
70 2013), different animal models (e.g. Trecek *et al.*, 2017), fungi and yeasts (e.g. Niessing *et al.*,  
71 2018) and plants (Bruno *et al.*, 2011; Duncan *et al.*, 2016b; Francoz *et al.*, 2016). Recent  
72 improvements involving fluorophores, microscopic detection and resolution now allow to  
73 localise individual mRNAs of interest (Buxbaum *et al.*, 2015). Patterns of mRNA expression  
74 and the subcellular localisation of mRNAs can thus be accessed. Ultimately this leads to a better  
75 understanding of the regulatory processes behind the translation of genetic information (Chen  
76 *et al.*, 2015), without requiring genetic manipulation of the organism of interest, nor the  
77 availability of extensive genetic and molecular data. Additionally, this can be applied to field-  
78 collected samples, which opens new research lines for uncultivable organisms once an mRNA  
79 sequence of interest is available.

80

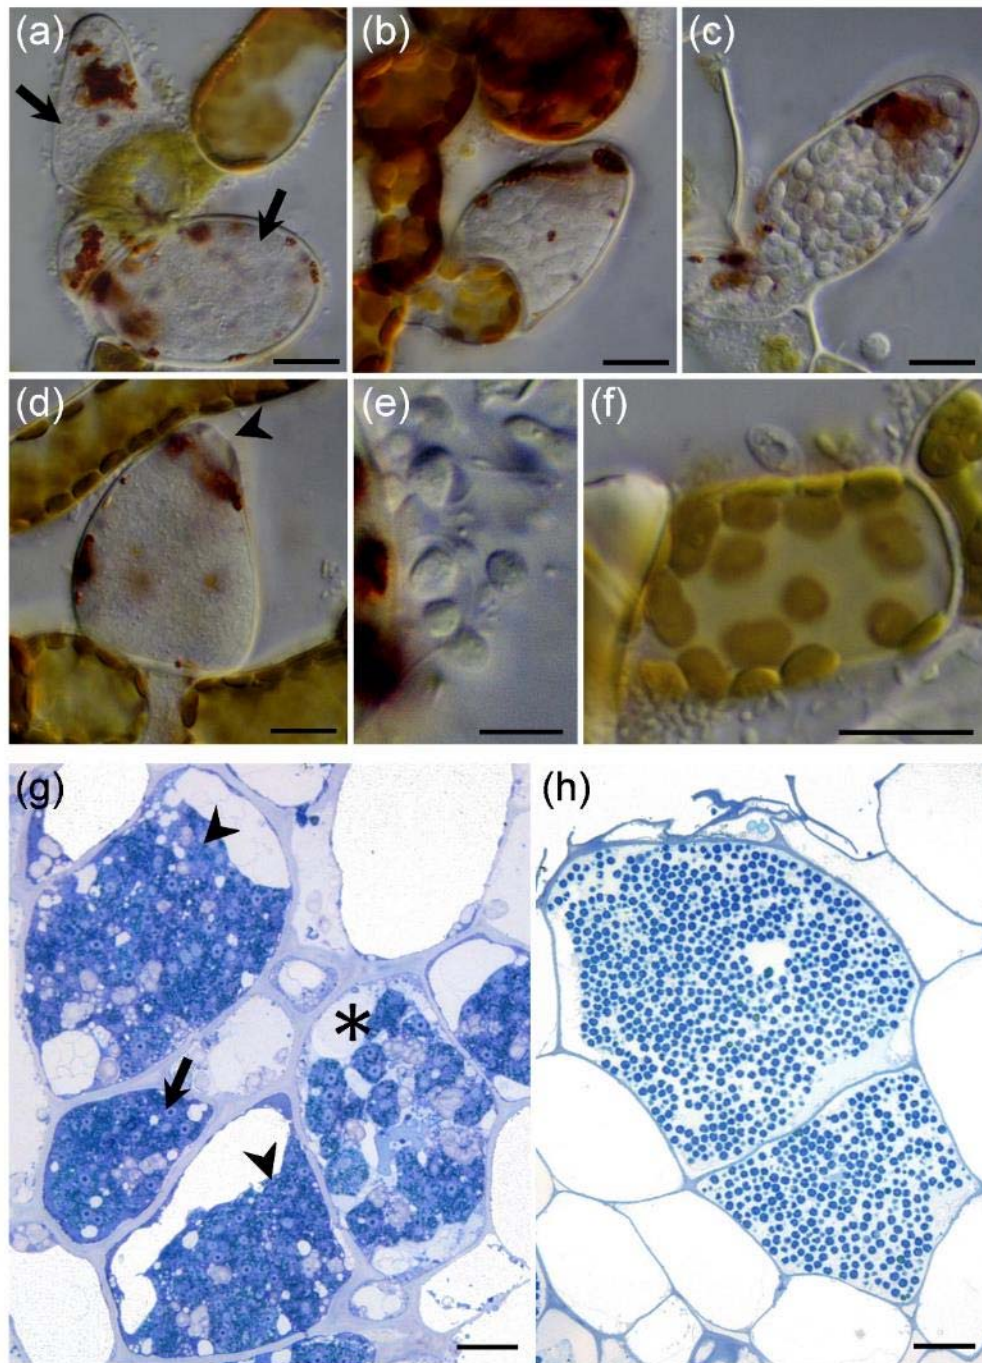

81

82 **Figure 1: Phytomyxid Morphology.** Sporangial life cycle of *Maullinia ectocarpii* (a-f) and sporogenic  
83 development of *P. brassicae* (g-h). a-f: *Maullinia ectocarpii* infecting filaments of the brown algae *Macrocystis*  
84 *pyrifera*. Pale cells are filled with the parasite. (a) sporangial plasmodia in enlarged algal cells (arrows). (b)  
85 sporangial plasmodium transitioning to form a zoosporangium. (c) mature zoosporangium filled with zoospores.  
86 (d) empty sporangium after the primary zoospores were released through an apical opening (arrowhead). (e)  
87 primary zoospores with two anterior flagella. (f) primary zoospore infecting the algal filament. (g, h) Chinese  
88 cabbage clubroots, cross section, methyleneblue staining (g) multinucleate, sporangial plasmodia in different  
89 developmental stages. Actively growing, sporogenic plasmodia (arrow, arrowheads) and one plasmodium showing  
90 the typical lobose structure (asterisk). (h) *P. brassicae* resting spores. All resting spores inside of one host cell  
91 were formed from the same sporogenic plasmodium. Bars = 10  $\mu$ m.

92

93 Phytomyxea (Rhizaria, Endomyxa) are a group of economically important plant pathogens,  
94 including e.g. *Plasmodiophora brassicae*, the clubroot pathogen, causing a loss of roughly 10  
95 % of the world brassica crop production (Schwelm *et al.*, 2018). Additionally, ten phytomyxid  
96 species parasitize important marine primary producers, namely brown algae, seagrasses and  
97 diatoms, with essentially unknown ecological consequences (Neuhauser *et al.*, 2011; Murúa *et*  
98 *al.*, 2017). In brown algae, the galls formed by *Maullinia braseltonii* on the Pacific bull kelp  
99 (*Durvillea antarctica*) affect the commercial value of this locally important food source. Its  
100 closely related parasite, *Maullinia ectocarpii*, infects a broad range of filamentous algae  
101 spanning at least four orders, including the genome model *Ectocarpus siliculosus* and  
102 gametophytes of the giant kelp *Macrocystis pyrifera* (Maier *et al.*, 2000). Its availability in  
103 laboratory culture makes it a good model to start deciphering the interaction between  
104 phytomyxids and their marine hosts.

105 Despite their importance as plant and algal pathogens, Phytomyxea have been difficult to study,  
106 mostly because they cannot be cultured without their host and because they have a complex  
107 multi-stage life cycle (Schwelm *et al.*, 2018). This life cycle comprises two functionally  
108 different types of heterokont zoospores (primary and secondary), multinucleate plasmodia  
109 (sporangial and sporogenic), zoosporangia and resting spores. Primary zoospores (Fig. 1e)  
110 infect suitable hosts (Fig. 1f) and develop into multinucleate sporangial plasmodia (Fig. 1a)  
111 which mature (Fig. 1b, 1c) and release primary or secondary zoospores. This sporangial part of  
112 the life cycle is often restricted to few host cells. Secondary zoospores develop into  
113 multinucleate sporogenic plasmodia (Fig. 1g) which can grow to considerable size inside of the  
114 host, which in some species results in the typical hypertrophies. The sporogenic part of the life  
115 cycle ends in the formation of the resistant resting spores (Fig. 1h). Resting spores are passively  
116 released from the disintegrating host tissue and can persist for decades in the environment.

117 Genome and transcriptome data became available only recently for *P. brassicae* (Schwelm *et*  
118 *al.*, 2015; Rolfe *et al.*, 2016). Yet the unavailability of genetic manipulation of the parasite  
119 forces all functional studies to be conducted on transformed plant hosts (mainly *A. thaliana*)  
120 either focussing on the host side of the response (e.g. Irani *et al.*, 2018) or by overexpressing *P.*  
121 *brassicae* genes in the host (Bulman *et al.*, 2019) or in other plant pathogenic fungi (Singh *et*  
122 *al.*, 2018). Likewise, genome resources are available for brown algae (Ye *et al.*, 2015; Cormier  
123 *et al.*, 2016), but this group yet remains inaccessible to transformation, genome editing or  
124 RNAi, to the exception of *Fucus* zygotes (Farnham *et al.*, 2013). Apart from taxonomic  
125 markers, no molecular information is currently available for *Maullinia ectocarpii* or any other  
126 marine phytomyxid nor can it be genetically modified. In this context, the prospect of  
127 monitoring gene expression of phytomyxean parasites in their host, linking the expression of  
128 selected genes of interest to specific stages of the life cycle and to specific time points in the  
129 development of the pathogen, is to get a better understanding of the interaction and the possible  
130 function of such a particular gene.

131 Here, we developed tools to monitor gene expression of intracellular pathogens and to monitor  
132 the response of their hosts (plants and brown algae) upon infection. We provide a proof-of-  
133 concept of the usefulness of single-molecule FISH to increase knowledge about the complex  
134 interactions between plants, algae and phytomyxids. For this purpose, two different approaches  
135 of mRNA localisation were evaluated: smFISH (single molecule FISH), which is based on a  
136 series of fluorescently labelled probes that tile along the mRNA of interest (Duncan *et al.*,

137 2016b) and RCA-FISH (Rolling Circle Amplification-FISH), which is based on *in situ*  
138 transcription of RNA followed by *in situ* -RCA signal amplification (Weibrecht *et al.*, 2013).  
139 Genes were selected on the basis of available biological background, to allow to not only test  
140 and validate FISH methods, but to also validate the feasibility and usefulness of these methods  
141 to disentangle biological information. The following *P. brassicae* genes were selected (i) the  
142 housekeeping gene *Actin1* (GenBank: AY452179.1) (Archibald & Keeling, 2004) (ii) a  
143 SABATH-type methyltransferase from *P. brassicae* (*PbBSMT*, GenBank: JN106050.1,  
144 (Ludwig-Müller *et al.*, 2015), which is able to methylate the plant defence compound salicylic  
145 acid (SA), as well as benzoic and anthranilic acids. To monitor mRNA expression and  
146 localisation in the host, the following genes were tested: (i) the *Brassica rapa* maltose excess  
147 protein 1 (*MEX1*, GenBank: XM\_009109278.2) that encodes a maltose transporter, and (ii) the  
148 vanadium-dependent bromoperoxidase (*vBPO*) of *Ectocarpus siliculosus* Ec32m (Genbank:  
149 CBN73942.1), encoding a stress-inducible enzyme assumed to halogenate defensive host  
150 secondary metabolites (Leblanc *et al.*, 2015; Strittmatter *et al.*, 2016).

## 151 **MATERIAL AND METHODS**

152

### 153 **Preparation and storage of the biological material**

154

#### 155 Clubroot-infected Brassica plants

156

#### 157 Field sampling

158 Clubroot infected white cabbage (*Brassica oleracea* var. *capitata* f. *alba*), broccoli (*Brassica*  
159 *oleracea* var. *italica*), Chinese cabbage (*Brassica rapa* ssp. *pekinensis*) and kohlrabi (*Brassica*  
160 *oleracea* var. *gongylodes*) were collected from a commercial field (Ranggen, Austria,  
161 47°15'24"N, 11°13'01"E). Clubroots were rinsed with tap water and treated as described below.

#### 162 Inoculation and cultivation of plants

163 Chinese cabbage (*Brassica rapa* cv. 'Granaat', European Clubroot Differential Set ECD-05)  
164 seeds were germinated on wet tissue paper for three days and then planted in a potting soil  
165 mixture (pH ~ 5.7, mixing standard compost, rhododendron soil and sand 4:2:2). Plants were  
166 grown with a photoperiod of 12 h. After 12 days, plants were inoculated with  $7 \times 10^6$  spores of  
167 *P. brassicae*. Root galls were harvested after six to seven weeks.

#### 168 Sample Fixation and preparation

169 Clubroots were cut into ca. 3 x 4 mm pieces to allow for a more homogenous fixation. Samples  
170 were transferred into Histofix 4% (phosphate-buffered formaldehyde solution, Carl Roth)  
171 where they remained for 1 - 12 h depending on sample size. Samples were used directly, or  
172 were washed in an ascending ethanol series for long-term storage (50 %, 80 %, 2x 96 %; all  
173 dilutions made with DEPC [diethyl pyrocarbonate]-treated water) and stored at -20 °C until  
174 use.

175 Clubroots (or clubroot pieces) were cut transversal with an RNase free razor blade by hand and  
176 washed with 1x PBS buffer (phosphate-buffered saline, 137 mM NaCl, 10 mM phosphate, 2.7  
177 mM KCl, DEPC treated water). Making the cuts by hand posed a significantly lower risk of  
178 RNase contamination than using a cryotome (Reichert-Jung, Frigocut 2800, Suppl. Note S1).

179

#### 180 Growth and maintenance of *M. ectocarpii* infected *Ectocarpus siliculosus* Ec32m and 181 *Macrocystis pyrifera*

182 *Ectocarpus siliculosus* (fully sequenced genome strain Ec32m, CCAP 1310/4) was infected  
183 with *Maullinia ectocarpii* (CCAP 1538/1), using a clonal culture of *Macrocystis pyrifera*  
184 female gametophyte (CCAP 1323/1) as an intermediate host, as described by (Strittmatter *et*  
185 *al.*, 2016). Cultures were maintained at 15 °C with 12 h photoperiod, 20 micromol photon m<sup>-2</sup>  
186 s<sup>-1</sup> in artificial seawater (ASW) with half strength modified Provasoli (West & McBride, 1999).  
187 Cultures were regularly checked microscopically and samples were harvested and fixed as  
188 described above, replacing DEPC-treated water by DEPC-treated ASW. Samples were stored  
189 at -20 °C until use.

190

#### 191 **mRNA visualisation**

192 To prevent RNase contamination, experiments were done in RNase-free environment with  
193 RNase-free reaction mixtures. To avoid photobleaching, the samples were protected from light  
194 during and after the hybridisation of the fluorescently labelled oligonucleotides. All enzymes

195 and reaction mixtures were kept on ice during use. Reaction tubes were incubated using a PCR  
 196 cyclor with heated lid to avoid evaporation or a thermal block. All incubation and amplification  
 197 steps were performed in 0.2 mL PCR reaction tubes unless otherwise stated.

198

199 **RCA-FISH (Rolling circle amplification – Fluorescence in Situ Hybridisation)**

200 RCA-FISH is based on the *in situ* reverse-transcription of mRNA, a subsequent signal  
 201 amplification using a loop-shaped DNA target probe as starting point for the RCA amplification  
 202 and followed by FISH detection of the so amplified DNA (Tab. 1) (Weibrecht *et al.*, 2013).  
 203 Experimentally this process can be divided into four steps: (i) Reverse transcription of target  
 204 mRNAs, using a mRNA specific locked nucleic acid (LNA) primer. (ii) RNase H digestion of  
 205 the RNA part of the RNA/DNA hybrid sequence, because in all subsequent steps the cDNA  
 206 generated by the reverse transcription serves as template. (iii) RCA amplification: A so-called  
 207 padlock probe, which forms a little loop when binding to the cDNA, serves as circular DNA  
 208 template for RCA. The loop like sequence is amplified and as a part of it a sequence  
 209 complementary to the detection probe. (iv) Signal detection: A standard FISH probe is used to  
 210 detect the amplified signal.

211

212 **Table 1:** RCA-FISH probes. *PbBSMT* (GenBank: JN106050.1) and *Actin1* (GenBank: AY452179.1) are genes of  
 213 *P. brassicae*. LNA modified nucleotides are shown in orange, padlock probe target-specific parts are shown in  
 214 italics and bold letters and the detection sequences are shown underlined.

| Oligonucleotide                            | Sequence                                                                                                                              |
|--------------------------------------------|---------------------------------------------------------------------------------------------------------------------------------------|
| <b><i>PbBSMT</i> (GenBank: JN106050.1)</b> |                                                                                                                                       |
| LNA primer <i>PbBSMT</i>                   | 5' CCC GTT CAC CTG GCA TGA CTA TTC G 3'                                                                                               |
| Padlock probe <i>PbBSMT</i>                | 5' phosphate - <i>ATA AAA CTC GAA TAG</i> TTC GTT TTA TTA <u>GGT CAA TGT CTG CTG</u><br><u>CTG TAC TAC TCT TTT AGC GTT CGT TCC</u> 3' |
| Detection probe <i>PbBSMT</i>              | 5' Cy3 – GGT CAA TGT CTG CTG CTG TAC TAC 3'                                                                                           |
| <b><i>Actin1</i> (GenBank: AY452179.1)</b> |                                                                                                                                       |
| LNA primer <i>Actin1</i>                   | 5' CGT ACC AGT CGA TCA TGA AGT GCG ACG 3'                                                                                             |
| Padlock probe <i>Actin1</i>                | 5' phosphate – <i>AGT CGA CGT CGC ACT</i> TTG ATT TAC TAG <u>GCC AAT GTC CTC</u><br><u>AGT ACT ACT ACT CTT ACA GGT CCT TGC GGA</u> 3' |
| Detection probe <i>Actin1</i>              | 5' Cy3 – GGC CAA TGT CCT CAG TAC TAC TAC 3'                                                                                           |

215

## 216 **Primer and probe design:**

217 ***LNA-Primer:*** LNA primers were approximately 25 bp long and located close to the 3' end of  
218 the mRNA. Starting from the 5' end of the LNA primer, every second nucleotide was replaced  
219 by its LNA counterpart, in total 7 LNAs (Tab. 1).

220 ***Padlock Probe:*** About 15bp at each of the 3' and 5' ends of the padlock probe are  
221 complementary to the cDNA sequence. When these two regions bind to the cDNA, the central  
222 region of the probe (ca. 50 bp) forms a loop, similar to the shackle of a padlock. This central  
223 region contains a generic detection sequence (~ 23bp) flanked by random filler sequences (Tab.  
224 1). This loop-like structure serves as target for the Phi-Polymerase mediated RCA which is  
225 amplifying the detection sequence and consequently the signal. The padlock probe has to be  
226 phosphorylated before use. Overall the structure of the padlock probe is: 5' phosphate – ***15bp***  
227 ***complementary to cDNA*** – 5-15bp random filler – detection sequence - 5-15bp random filler -  
228 ***15bp complementary to cDNA*** - 3'.

229 ***Detection Probe:*** This is a fluorescent, mono-labelled FISH probe complementary to the  
230 detection sequence included in the padlock probe.

231 To check the secondary structures in all three types of probes, UNAFold  
232 (<https://eu.idtdna.com/UNAFold>) was used. Specificity and potential off-target binding sites  
233 were checked by blasting the sequences (<https://blast.ncbi.nlm.nih.gov/>) against the nr database.

234

## 235 **RCA-FISH experimental Method**

236 A tick-off style, step-by-step protocol is provided in Suppl. Note S2. Modifications and notes  
237 on filamentous starting material is provided in Suppl. Note S1.

238 Sections from clubroot samples or algal material were transferred into the reaction tubes where  
239 they were rehydrated in PBS-T (0.05% Tween-20 in 1x PBS). Several sections may be treated  
240 in one tube, as long as the material is submerged in the reaction mix. For our samples 50  $\mu$ l of  
241 reaction mix were required for consistent results. The PBS-T was removed and the reverse  
242 transcription mix (20 U  $\mu$ l<sup>-1</sup> RevertAid H minus M-MuLV reverse transcriptase, 1 U  $\mu$ l<sup>-1</sup>  
243 RiboLock RNase inhibitor, 1x M-MuLV RT buffer, 0.5 mM dNTP, 0.2  $\mu$ g  $\mu$ l<sup>-1</sup> BSA, 1  $\mu$ M  
244 LNA primer) was added. Samples were incubated for 1 h at 37 °C in a PCR cycler. Samples  
245 were washed twice with PBS-T and were then incubated in 3.7% PFA (paraformaldehyde in 1  
246 x PBS) for 5 min at room temperature. Samples were washed in PBS-T. This was followed by  
247 RNase H digestion, hybridisation and ligation of the padlock probe in the hybridisation mix (1  
248 U  $\mu$ l<sup>-1</sup> Ampligase, 0.4 U  $\mu$ l<sup>-1</sup> RNase H, 1 U  $\mu$ l<sup>-1</sup> RiboLock RNase inhibitor, 1x Ampligase buffer,  
249 0.2  $\mu$ g  $\mu$ l<sup>-1</sup> BSA, 0.05 M KCl, 20% formamide, 0.1  $\mu$ M padlock probe). Samples were incubated  
250 for 15 min at 45 °C and washed in PBS-T. Rolling circle amplification was done for 45 min at  
251 37 °C (polymerase reaction mix: 1 U  $\mu$ l<sup>-1</sup> Phi29 DNA polymerase, 1 U  $\mu$ l<sup>-1</sup> RiboLock RNase  
252 inhibitor, 1x Phi29 buffer, 0.25 mM dNTP, 0.2  $\mu$ g  $\mu$ l<sup>-1</sup> BSA, 5% Glycerol), followed by a PBS-  
253 T washing step. The detection probe was hybridised for 10 min at 37 °C in a detection probe  
254 reaction mix (1x hybridisation mix (2x SSC saline-sodium citrate buffer (300 mM sodium  
255 chloride, 30 mM sodium citrate), 40% (vol/vol) formamide, 0.1  $\mu$ M detection oligonucleotide).  
256 Samples were washed twice with PBS-T. Samples were carefully transferred and arranged on  
257 microscope glass slides, mounted with Vectashield (H-1000, Vector Laboratories) mounting  
258 medium and covered with a coverslip. The coverslips were sealed with clear nail polish and the



259 slides were imaged using a laser scanning microscope. To exclude the possibility of false  
260 positive signals, control samples were treated without padlock probes.

261

### 262 Single molecule FISH (smFISH)

263 smFISH relies on a large number of mono-labelled DNA-probes complementary to the mRNA  
264 sequences of interest. The protocol described here was adapted from (Duncan *et al.*, 2016a).  
265 Probes for smFISH were designed and ordered using the Stellaris<sup>®</sup> Probe Designer  
266 (<http://singlemoleculfish.com>, all probes labelled with Quasar570) or ordered via  
267 <https://biomers.net/> (Cy3 labelled probes). A set of 48 different probes was generated,  
268 complementary to our mRNA sequences of interest (*PbBSMT* GenBank: JN106050.1, *vBPO*  
269 GenBank CBN73942.1, *MEXI* GenBank: XM\_009109278.2, Suppl. Tab. S1-3). To verify the  
270 specificity of the oligonucleotides to the target sequence, the sequences were blasted against  
271 the NCBI nr database.

272

### 273 smFISH experimental method

274 A tick-off style step-by-step protocol is provided in Suppl. Note S3.

275 Samples were washed in 1x PBS buffer and were transferred to 0.2 mL PCR tubes and incubated  
276 for 1 h in 70% EtOH at room temperature. The EtOH was removed and samples were washed  
277 twice for three minutes in washing buffer (10% formamide, 2x SSC). Samples were then  
278 incubated in 50  $\mu$ l of hybridisation buffer (100 mg ml<sup>-1</sup> dextran sulfate, 40% formamide in 2x  
279 SSC, 250 nM probe-mix) in a PCR cycler at 37 °C overnight with the lid heated to 100 °C to  
280 prevent evaporation. Subsequently, the hybridisation buffer was removed and the samples were  
281 rinsed twice with washing buffer, before being incubated in the washing buffer at 37 °C for 30  
282 minutes. Nuclei were counterstained in 50  $\mu$ l 4,6-diamidino-2-phenylindole (DAPI) solution  
283 (100 ng  $\mu$ l<sup>-1</sup> in washing buffer) for 15 min at 37 °C. Samples were washed in 50  $\mu$ l 2x SSC for  
284 1 min before being equilibrated in 50  $\mu$ l GLOX buffer (0.4% glucose in 10 nM Tris-HCl, 2x  
285 SSC) for 3 minutes, followed by 50  $\mu$ l GLOX buffer containing enzymes (1% glucose oxidase  
286 and 1% catalase in GLOX buffer) after removal. Samples were carefully mounted using  
287 tweezers in the GLOX buffer containing enzymes. The mounted samples were sealed with nail  
288 polish and imaged as soon as possible to avoid a reduction of image quality.

289 To confirm RNA specificity and to evaluate autofluorescence of the samples, control samples  
290 were treated with RNase or were analysed without the addition of smFISH probes. RNase A  
291 treatment for sample sections was performed for 1 h at 37 °C (100  $\mu$ g ml<sup>-1</sup>) before the  
292 hybridisation step (Supplementary Note S3, between steps 4 and 5). After RNase A digestions  
293 the samples were washed twice in 10 mM HCl for 5 min and rinsed twice in 2x SSC for 5 min.  
294 These samples were then incubated with the smFISH probes as described above. Quasar570  
295 labelled smFISH probes were used with the corresponding Stellaris buffers. Those samples  
296 were mounted in Roti-Mount FluorCare (Carl Roth).

297

### 298 **Image acquisition and data analyses**

299 Images were acquired with a Leica SP5-II confocal laser scanning microscope (CLSM), using  
300 the LAS AF software (version 2.7, Leica Microsystems, Germany) and a Zeiss Cell  
301 Observer.Z1 Spinning Disk microscope using the ZEN software (Carl Zeiss Microscopy,  
302 Germany). The Leica SP5-II CLSM was equipped with a hybrid detector and a 20x (0.7 NA)

303 or 63x (1.3 NA) objective lens and with the following lasers: 405 nm, 458 nm, 514 nm, 561  
304 nm, 633 nm. For probes labelled with Cy3 (*Actin1*, *PbBSMT*, and *vBPO*) and Qu570 (*MEX1*),  
305 an excitation of 514 nm was used and the emission was detected at 550 – 585 nm. For DAPI  
306 staining, 405 nm excitation was used and emission was detected at 430 – 485 nm. The Zeiss  
307 Axio Cell Observer.Z1 was equipped with a CSU-X1 spinning disc confocal using 25x, 40x or  
308 63x water-immersion lenses. Raw image stacks were deconvoluted with the Huygens software  
309 package (Scientific Volume Imaging, The Netherlands). Images were analysed using ImageJ  
310 (Schneider *et al.*, 2012) which was used to generate coloured overlay images of the different  
311 emissions recorded and for creating maximum projections of the z-stacks. Resizing and linear  
312 brightness and contrast adjustments were performed in GIMP 2.8.22 ([www.gimp.org](http://www.gimp.org)). The  
313 original unprocessed images will be deposited at figshare using the final numbering of the  
314 figures.

315 FISH signals in individual stack slices appeared dotted and therefore we used the “find maxima”  
316 process in ImageJ to segment and count these dots. With the help of the "find stack maxima"  
317 macro this process was automated for every slice in a CLSM stack (Suppl. Fig. S3, S4). CLSM  
318 settings were defined in advance to record individual signals in 2 consecutive slices to yield full  
319 signal coverage (minimum pinhole settings resulting in a slice thickness of 0.85 $\mu$ m; z-stepsize  
320 around 0.8  $\mu$ M or below). Noise tolerance values were evaluated preliminary to best fit the  
321 fluorescence signal. Regions of interest (ROI) were marked manually (Suppl. Fig. S1, S2, S3),  
322 measured and saved. Finally, automated counts of every slice in a stack within a ROI were  
323 summarised and normalised to volume and corrected for slice number and z-stepsize. Results  
324 are presented in number of FISH signal maxima per  $\mu$ m<sup>3</sup>.

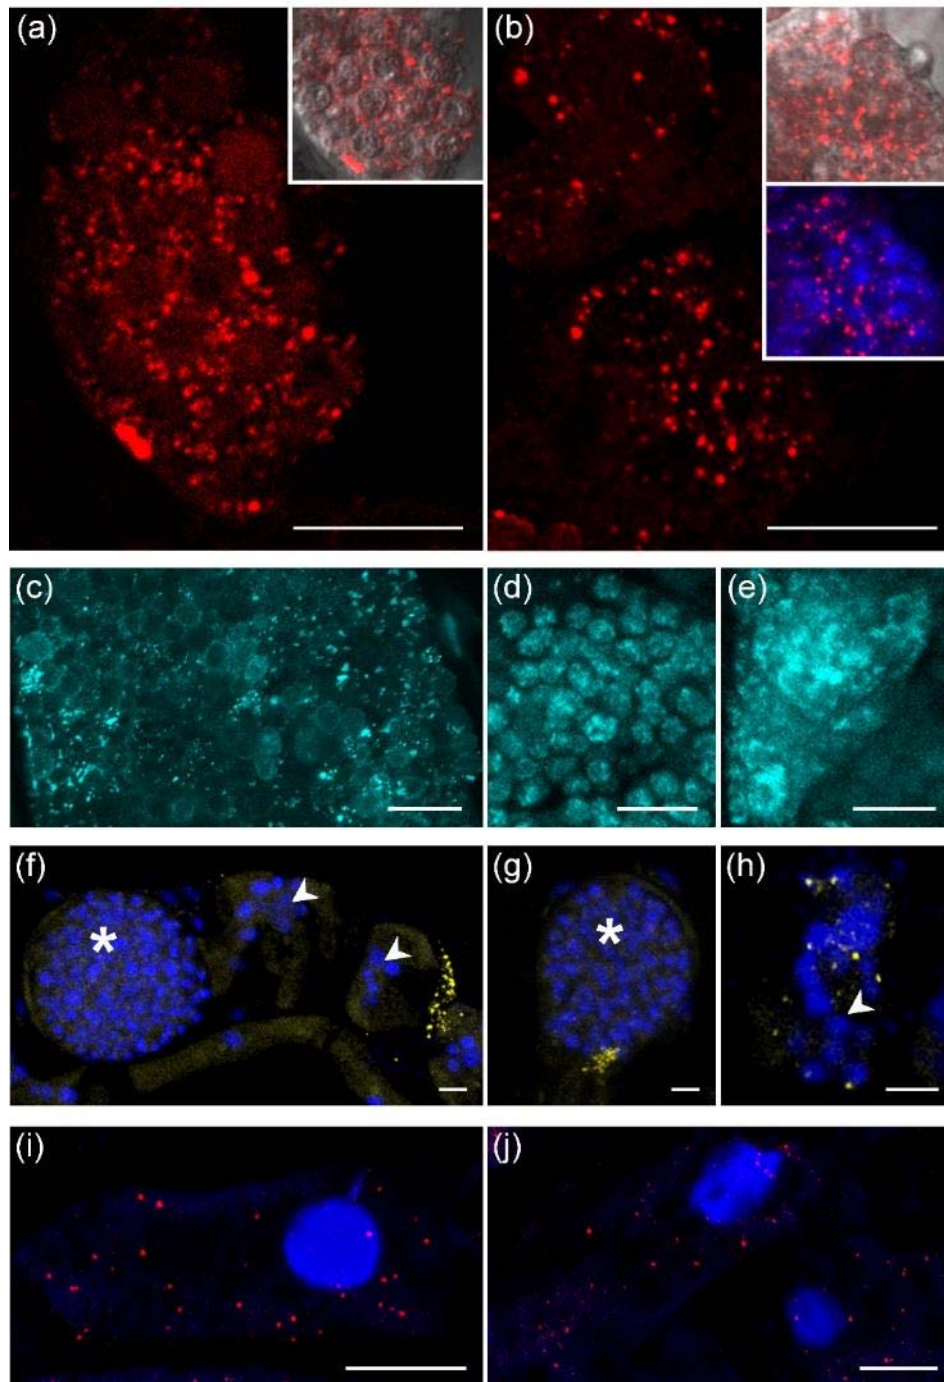

325

326 **Figure 2: mRNA-transcript localisation in *P. brassicae* (a-e, Cy3), *Ectocarpus siliculosus* Ec32m (f-h, Cy3)**  
327 **and *Brassica rapa* (i-j, Qu570).** (a) mRNAs of *P. brassicae* *PbBSMT*, RCA FISH and, (b) smFISH. The plasmodia  
328 in (a) and (b) are transitioning from the active growth phase of the plasmodium to resting spore formation, which  
329 can be recognised by the round “compartments” visible in the bright field inserts. Multiple nuclei can be seen (b,  
330 insert). (c-e): *Actin1* mRNAs of *P. brassicae* using RCA FISH (cyan). (c) during the onset of resting spore  
331 formation. (d) in the developing resting spores. (e) in actively growing sporogenic plasmodia. (f-h): Localisation  
332 of Ec32m *vBPO* mRNAs (yellow signal) using smFISH. (f) *vBPO* mRNAs close to sporangia of *M. ectocarpii*. (g,  
333 h) *vBPO* mRNAs inside of *M. ectocarpii* infected cells. arrowheads: early infection, plasmodia containing several  
334 nuclei; asterisks: later infection stage, large plasmodia with numerous parasite nuclei. (i, j): *MEX1* mRNAs in the  
335 cytosol of infected *B. rapa* root cells using smFISH (Red signals, Quasar 570). *MEX1* mRNAs are detected near  
336 the amyloplasts (black areas). Bars = 10  $\mu$ m. Images of the controls of these experiments are provided in Suppl.  
337 Fig. S4.

338

## 339 **RESULTS**

340 Two *P. brassicae* genes were analysed using RCA-FISH: the SABATH-type methyltransferase  
341 *PbBSMT* and *Actin1*. In contrast to *Actin1*, a spatiotemporal expression pattern has already been  
342 hypothesised for *PbBSMT* since only low expression of the transcript was detected during early  
343 time points of infection and it only later increased (Ludwig-Müller *et al.*, 2015); thus we also  
344 analysed its expression using smFISH to compare the performance of both methods,  
345 qualitatively and quantitatively.

346

### 347 **Qualitative and quantitative comparison of smFISH and RCA-FISH**

348 Localisation of *PbBSMT* mRNAs resulted in the same spatio-temporal pattern of dotted signals,  
349 when smFISH or RCA-FISH were used (Fig 2 a-b, see details in Suppl. Figs. S1, S2, S3, S4,  
350 S6 – S8). In z-stack maximum projections mRNA signals can appear clustered. However, single  
351 signals in individual planes appear as dots with sizes ranging from 0.2 to 0.7  $\mu\text{m}$  (Suppl. Fig.  
352 S3, S4, Video S1). No signal could be detected in the controls without padlock probe (RCA  
353 FISH, Suppl. Fig S5a), after RNase treatment (smFISH, Suppl. Fig. S5b) and in uninfected  
354 plant roots (data not shown).

355 The hypothesised spatiotemporal expression pattern of *PbBSMT* was identified with RCA-  
356 FISH (Fig. 3 g, h) and smFISH (Fig. 3i, Suppl. Fig. S8). Specifically, *PbBSMT* mRNAs started  
357 to appear in large quantities once sporogenic plasmodia started to develop into spores (Fig. 3g);  
358 the signals appeared dot-like in the individual planes, while in the maximum projection the  
359 mRNAs appeared accumulated around the developing spores. With progressing spore  
360 formation, the intensity and number of signals intensified around the outside the developing  
361 spores, both in individual layers, where most of the signals were still visible as separated dots,  
362 and in the maximum projection where mRNA signals appeared to cover the surface of the  
363 developing spores (Fig. 3 h, see 3D reconstruction in Suppl. Video S1). Subsequently, the  
364 signals became fewer and smaller until they disappeared once the spores were fully developed  
365 (Fig. 3 i). This pattern indicates that the presence of *PbBSMT* or its mRNA plays a role during  
366 the transition from plasmodial growth to sporogenesis in *P. brassicae*.

367 In addition to the previously reported increase of *PbBSMT* expression during the later phases  
368 of the pathogen life cycle *PbBSMT* mRNAs could be detected in plasmodia that clearly were in  
369 the very early stage of secondary infection (Suppl. Fig. 5). Those plasmodia were very small in  
370 size (ca. 20  $\mu\text{m}$ ) and the host cells did not yet show the typical hypertrophied phenotype. This  
371 phenotype is typical for cells, which house the much larger, actively growing multinucleate  
372 plasmodia that can easily reach 100 – 150  $\mu\text{m}$  in size. The young plasmodia in which the  
373 *PbBSMT* mRNAs were detected did also appear to move from one cell to the next (Suppl. Fig.  
374 S6, S7).

375 The number of signal maxima per  $\mu\text{m}^3$  was higher with RCA FISH (median  $4,47 \times 10^{-02} \pm$   
376 RSD  $3,01 \times 10^{-02}$  signal maxima  $\mu\text{m}^{-3}$ , n=9) than with smFISH (median  $9,38 \times 10^{-03} \pm$  RSD  
377  $5,26 \times 10^{-02}$  signal maxima  $\mu\text{m}^3$ , n=37 Suppl. Tab. 4). However, when smFISH was used, the  
378 number of cells in which signals could be detected was considerably higher and more consistent  
379 across different samples. Additionally, the detection efficacy of smFISH was higher: more cells  
380 produced usable results comparing the number of positive cells per image per experiment  
381 (Suppl. Fig. S1, S2). Overall the detection efficacy of RCA FISH was lower (ca. 30% positive  
382 experiments, n = 16) compared to smFISH (ca. 45% positive experiments, n = 35). Therefore,

383 we concluded that for detecting mRNAs in *P. brassicae* smFISH is more suitable: the reduced  
384 number of signal maxima  $\mu\text{m}^{-3}$  are compensated by a 5-10-fold increased number of cells with  
385 positive signals and a 15 % higher success rate. For this reason, transcripts of *Brassica oleracea*  
386 (*MEX1*) and *Ectocarpus siliculosus* (*vBPO*) were analysed with smFISH only.

387

### 388 **Microscopic analyses**

389 We also compared CLSM and spinning-disk microscopy. Both methods performed very similar  
390 producing complementary mRNA detection patterns (Suppl. Fig. S7). Hand-cutting of clubroot  
391 tissue was the best and most reliable method to prepare samples for microscopy (Suppl. Note  
392 S1), which resulted in slightly uneven samples. Because of this, CLSM was the method of  
393 choice because it better allows to analyse thicker samples than wide field and spinning disk  
394 microscopy.

395

### 396 **Localisation of *P. brassicae Actin1* by RCA-FISH**

397 The *Actin1* mRNA was detected in all life cycle stages of *P. brassicae* (Fig. 2c-e, Suppl. Fig  
398 S9), as bright, dot-like structures. Signals were spread evenly within cells (Fig. 2c-e) and could  
399 be visualised in individual planes (Suppl. Fig. S9 c-d), while in the maximum projection of all  
400 optical slices these dots often accumulated to larger signal hotspots (Fig 2c, Suppl. Fig. S9 e,  
401 f). In maximum projections dots were sometimes well separated (Fig 2c), while in other cells  
402 the signal was less defined appearing “blurred” and filling most of the cell without clear  
403 structural pattern (Fig 2e), indicating areas with multiple mRNA copies. The controls did not  
404 show any comparable signals, only a very weak background of autofluorescence was detected  
405 (Suppl. Fig. S5 c-e, Fig. S9 a-b).

406

### 407 **Localisation of host (plant and algal) transcripts during infection by phytomyxids**

408 To evaluate whether it is possible to detect host transcripts within the same samples that host  
409 the phytomyxids, two mRNAs were chosen and analysed.

#### 410 *Brassica rapa* maltose excess protein 1 (*MEX1*, smFISH)

411 *MEX1* encodes a transporter located in the chloroplast envelope; it is essential for the transport  
412 of maltose, the main product of starch breakdown, from the amyloplast to the cytosol (Stettler  
413 *et al.*, 2009). Starch is an important source for sugar within infected tissues to provide nutrients  
414 to *P. brassicae* as shown by the accumulation of starch grains in highly infected cells (Schuller  
415 & Ludwig-Müller, 2016). *MEX1* transcripts were detected as clear dots in the cytosol of the  
416 Brassica root cells. Dot-like signals could be observed in root cells containing amyloplasts,  
417 which were infected with *P. brassicae* (Fig. 2 i-j). The signal for *MEX1* was not present in cells  
418 filled with spores and cells that did not contain amyloplasts (Suppl. Fig. S10). Similar to the  
419 previously described genes localised detection (“dots”) could be seen in the individual optical  
420 slices and the maximum projection images indicating that mRNAs for *MEX1* are present in the  
421 whole cytosol of the plant. In both controls, the RNase treated samples and the unlabelled  
422 infected samples, no characteristic signals were detected (Suppl. Fig. S5 i-j).

423

#### 424 *Ectocarpus siliculosus* vanadium-dependent bromoperoxidase (*vBPO*, smFISH)

425 mRNA detection in brown algae required adaptations of the protocol. The filamentous growth  
426 of *E. siliculosus* and of *M. pyrifera* gametophytes made it necessary to use small tufts of algal

427 material, which are difficult to handle because of their size and shape and do not attach well to  
428 Poly L-lysine-coated slides. To reduce the risk of loosing the samples, tubes were used to  
429 incubate and wash them (see Suppl. Note S1).  
430 *vBPO* has previously been shown to play a role in the response of *Ectocarpus siliculosus* Ec32m  
431 against pathogens (Strittmatter *et al.*, 2016) and more generally, in the responses of kelps to  
432 elicitors (Cosse *et al.*, 2009). RCA-FISH was tested without success on the algal material (data  
433 not shown), but smFISH allowed detection of *vBPO* mRNAs in Ec32m cells infected with the  
434 phytomyxid *Maullinia ectocarpii* (Fig. 2 f-h, Suppl. Fig. S11 g-i). Likewise, signals were  
435 detected in *M. ectocarpii* infected *M. pyrifera* cells (Suppl. Fig. S11 a-f). In both cases, signals  
436 were dot-like, yet much more confined - than in the plant and phytomyxids tested.

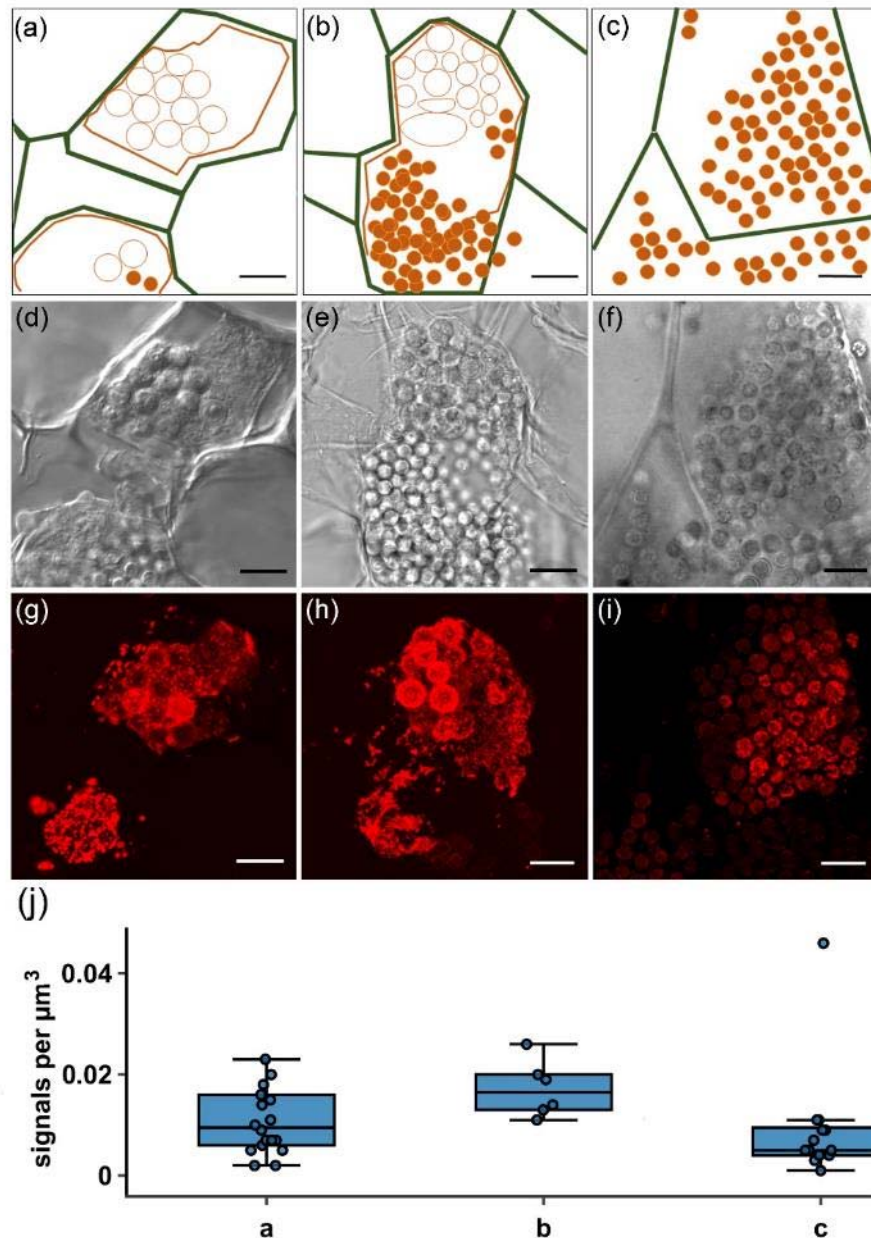

437

438 **Figure 3: Localisation and quantification of *PbBSMT* mRNA in *P. brassicae*.** a-c: diagrammatic overview of  
 439 the *P. brassicae* structures seen in the brightfield images (d-e) and the FISH images (g-i). (a) The cell that is fully  
 440 pictured in (a) shows a plasmodium which is at the onset of spore formation (orange polygon) inside a  
 441 hypertrophied host cell (cell walls are indicated by the green lines). At the onset of spore formation round, spore  
 442 like aggregations of the plasmodium become visible (orange circles). During this development stage high numbers  
 443 of mRNAs can be detected (see image g) which are randomly distributed when no structures are visible in the  
 444 plasmodium, but appear aggregated around the spore like structures. When the differentiation of the plasmodium  
 445 progresses (b) these spore like, aggregated areas become more distinct until they have developed into individual  
 446 resting spores which are not connected via the plasmodium anymore (orange dots). Signals peak around areas  
 447 which already start to be recognisable as individual portions and get less in areas where resting spores are formed.  
 448 Finally, the whole plasmodium has developed into resting spores (c, orange dots), that fill the entire host cell. The  
 449 mRNA signals decrease further in number and brightness before disappearing completely. Bars = 10  $\mu\text{m}$ . (j) Signal  
 450 maxima  $\mu\text{m}^{-3}$  of smFISH *PbBSMT* signals (n=37) highlighting a peaking of *PbBSMT* mRNAs during spore  
 451 formation. Labelling on the x-axes corresponds to the life cycle stages in images (a-c). No significant correlation  
 452 was identified. One extreme outlier at 0.088 signals  $\mu\text{m}^{-3}$  is not displayed to improve figure layout.

## 453 Discussion

454

### 455 **mRNA localisation is a powerful tool to study pathogen – host interactions**

456 Here, we demonstrate the feasibility of localising mRNA transcripts of phytomyxid pathogens  
457 and their plant and algal hosts, which to our knowledge is the first time this method has been  
458 used on brown algae, phytomyxids and to analyse biological interactions between two  
459 eukaryote species and in environmental samples. Localising mRNAs permits the identification  
460 and analyses of spatiotemporal pattern of mRNAs in the cytoplasm. Both methods tested  
461 (smFISH, RCA-FISH) are readily accessible once a gene of interest in biological interactions  
462 is identified. Using mRNA FISH allows to overcome important technical bottlenecks that  
463 hamper research on important non-model pathogens, plants or algae (Schwelm *et al.*, 2018).  
464 Our protocols therefore have huge potential to move our knowledge of these interactions  
465 beyond the limitations of RNAseq and organisms for which genetic amendments are possible  
466 (Buxbaum *et al.*, 2015) since the genes of interest can be studied in the environment of the  
467 direct interaction. Using clubroots from commercial fields, we directly show the applicability  
468 of the methods to investigate host-pathogen interactions in wild type populations and plants  
469 grown under natural conditions. The here presented methods will greatly increase our  
470 understanding of subcellular gene expression pattern, similar to the leap in knowledge that  
471 happened in model organisms in the coming years (Gaspar & Ephrussi, 2015; Lee *et al.*, 2016;  
472 Medioni & Besse, 2018).

473 FISH is – as any nucleic acid based method – very adaptable to the needs of the user. A  
474 multitude of protocols are available, many of which are variations of the two protocols tested  
475 here (reviewed by van Gijtenbeek & Kok, 2017). When selecting the most suitable method a  
476 couple of factors need to be kept in mind (Tab. 2). Generally, it can be said that the more  
477 complex a biological system, the less complex the method of choice should be: the efficacy for  
478 the detection of phytomyxid mRNAs was 15 % higher when the less complex smFISH method  
479 was used than with RCA-FISH. However, smFISH requires mRNAs which are longer than 500  
480 bp to fit a relevant number of probes, while this size restriction does not apply to RCA-FISH.  
481 We proved here that the two contrastingly complex FISH methods can be used to generate  
482 meaningful results (Tab. 2).

483 The mRNA signal pattern differed between plants, brown algae and *P. brassicae* (Fig. 2). Plant  
484 mRNAs followed the pattern that were expected based on the pioneering works on smFISH in  
485 plants (Duncan *et al.*, 2016b): mRNA signals were dot-like and distributed more or less evenly  
486 in cells and were similar in size and shape (Fig. 2i-j, Suppl. Fig. S10). The mRNA pattern in  
487 brown algae are comparable to the ones in plants, although signals were somewhat more  
488 restricted (Fig. 2f-h, Suppl. Fig. S11). The mRNA pattern observed in phytomyxids are only  
489 comparable when few mRNAs are detected in the plasmodia (e.g. Fig 2b). However, when  
490 many mRNAs are present close to each other the individual mRNAs do not resolve and are  
491 displayed as larger areas, especially in the maximum projections of the z-stacks (Fig. 2, Fig 3,  
492 Video S1). Although phytomyxid plasmodia are similar in size and shape to their host cell (Fig.  
493 3), each plasmodium has to be interpreted as an aggregation of hundreds to thousands small  
494 cells with an individual diameter of 3-5  $\mu\text{m}$  and each with its own nucleus (compare e.g. Fig 2b  
495 insert, or Fig 2 f-h). So the space which can be populated by mRNAs is much more confined  
496 than in the comparably gargantuan host cells. This is visually amplified in maximum projections



497 of z-stacks, because one plasmodium contains more than one layer of cells (one layer per 3-  
 498 5µm).. It is, however, very important to note that these technical and biological limitations are  
 499 clearly counterbalanced by the amount of biological information that can be gathered.

500  
 501

502 **Table 2: Advantages and disadvantages of RCA-FISH and smFISH.** Prices can vary and are estimates based  
 503 on Austrian prices 2019 including 20 % VAT.

|             | RCA FISH                                                                                                                                                                                                                                                                                                                                                                                                                                                                                                                                                                                                                                                                        | smFISH                                                                                                                                                                                                                                                                                                                                                                                                                                                                                                                                                           |
|-------------|---------------------------------------------------------------------------------------------------------------------------------------------------------------------------------------------------------------------------------------------------------------------------------------------------------------------------------------------------------------------------------------------------------------------------------------------------------------------------------------------------------------------------------------------------------------------------------------------------------------------------------------------------------------------------------|------------------------------------------------------------------------------------------------------------------------------------------------------------------------------------------------------------------------------------------------------------------------------------------------------------------------------------------------------------------------------------------------------------------------------------------------------------------------------------------------------------------------------------------------------------------|
| <b>Pros</b> | <ul style="list-style-type: none"> <li>▪ <b>Signal amplification</b> in theory allows to monitor single copy mRNAs also in samples with a high fluorescent background.</li> <li>▪ <b>Specificity:</b> Highly specific probes can be designed to distinguish between paralogues or SNPs .</li> <li>▪ <b>No gene length limitation:</b> short (&lt;500 bp) genes can be analysed.</li> <li>▪ <b>Modular:</b> Possibility of combination with <i>in situ</i> proximity ligation assays to collect information on mRNA-protein interactions or post-translational modification (not tested in the scope of this paper).</li> </ul>                                                  | <ul style="list-style-type: none"> <li>▪ <b>Signal amplification</b> in theory allows to monitor single copy mRNAs in samples with a high fluorescent background.</li> <li>▪ <b>Complexity:</b> easy probe design, few steps minimising contamination risks.</li> <li>▪ <b>Cell permeability:</b> small probes, no large functional molecules involved.</li> <li>▪ <b>Cost of reagents:</b> most reagents needed are standard lab consumables.</li> <li>▪ <b>Time:</b> Fast protocol, ca. 1 day from sample to image, hands on time ca 3 h.</li> </ul>           |
| <b>Cons</b> | <ul style="list-style-type: none"> <li>▪ <b>Complexity:</b> many steps increase the risk of RNase contamination or errors.</li> <li>▪ <b>Cell permeability:</b> Involves multiple steps requiring large enzymes which need to reach the cytoplasm. This is a major drawback for use in the plant/algal system.</li> <li>▪ <b>Costs of probes:</b> The expensive LNA- and Padlock probes need to be designed for each gene (ca. 400€ per gene for ~200 reactions).</li> <li>▪ <b>Costs of reagents:</b> pricey reagents and enzymes are used (ca 75€ per reaction).</li> <li>▪ <b>Time:</b> ca. 2 days from sample to image, of which there are ca 6 h hands on time.</li> </ul> | <ul style="list-style-type: none"> <li>▪ <b>Specificity:</b> using standard FISH probes in a “string of beads” manner opens possibility of false positives for isoforms, orthologues or conserved gene families.</li> <li>▪ <b>Gene length limitation:</b> Short mRNA sequences (&lt; 500 bp) are not suitable for smFISH.</li> <li>▪ <b>Costs of probes:</b> 24-48 labelled probes are needed for each gene. Some companies offer discounts on smFISH probes (ca. 500-800€ depending on the number of probes and the fluorophore, ~1000+ reactions).</li> </ul> |

504  
 505

### 506 **RNA stability and accessibility are crucial – or how do you get the protocol to work?**

507 Here we show that both smFISH and RCA-FISH methods are suitable for *in situ* mRNA  
 508 monitoring in the host and the pathogen. While analysing three totally different biological  
 509 systems (plants, algae, phytomyxids) it became clear that the overall success and efficiency of  
 510 the method is determined by the fixation of the mRNAs in the sample material and the  
 511 permeability of the cell walls, both factors that differ across organisms. Fixation methods and  
 512 the duration of storage post-fixation influenced the number of cells in which signals could be  
 513 detected; however, this was different across sample types and genes so no clear maximum or  
 514 minimum duration of storage could be established. Since decreasing signal intensities can be  
 515 caused by RNA degradation during storage, we recommend to use the samples as soon as  
 516 possible after harvesting. However, we found that samples kept in an RNase-free environment  
 517 give good results after more than one year. Another reason for decreasing signals can be  
 518 formaldehyde mediated covalent interlinking of mRNAs and the RNA-binding proteins which  
 519 are responsible for the transport of the RNA to the site of translation (Foley *et al.*, 2017;  
 520 Niessing *et al.*, 2018), or mRNA secondary structures that do not permit the binding of the

521 probes to the sites of interest (Ding *et al.*, 2013). Because of this, we recommend not to store  
522 the samples in the formaldehyde containing fixative, but to move them to pure ethanol for long  
523 term storage. RNA-binding proteins and mRNA secondary structure can impact on the success  
524 of the detection method without the fixation bias mentioned above, because both can limit the  
525 accessibility of the target site for probes (Foley *et al.*, 2017).

526 Also, the permeability of cell walls and plant tissue as a whole is a constraint for FISH-based  
527 methods. In this study, RCA-FISH was not adaptable to study interactions in filamentous algae,  
528 most likely because the enzymes needed could not permeate the cell walls. Cutting of the algae  
529 without destruction of the cell arrangement is very difficult and usually results in a loss of  
530 spatial information. All tested permeabilisation efforts did not improve the signal yield. Also in  
531 plants the efficacy of the mRNA detection was lower in RCA-FISH, as signals were only visible  
532 in cells which were cut open, but never in cells with an intact cell wall. The cooperatively small  
533 probes used for smFISH could be used on all samples without additional permeabilisation steps.

534

### 535 **mRNA localisation sheds light on phytomyxid biology**

536 In this study, we determined the expression and localisation pattern of three pathogen genes,  
537 one plant and one brown algal gene. All mRNAs chosen had a putative function assigned to  
538 pre-existing information on the expected expression pattern. However, the single cell resolution  
539 of our experiments resulted in information, which is already improving our understanding of  
540 the biological interaction. These findings also showcase the potential gain of using mRNA FISH  
541 to advance our knowledge on plant pathogen interactions beyond the state of the art.

542 Biologically most interesting was the expression pattern of *PbBSMT*, a SABATH-type  
543 methyltransferase produced by *P. brassicae*. This methyltransferase has structural similarities  
544 to plant methyltransferases and is able to methylate SA. Previous qPCR analysis of its  
545 expression pattern showed, that its expression during clubroot development is highest when the  
546 concentration of SA in the roots peaks, which is the reason why a role in disease development  
547 of this gene has been discussed (Ludwig-Müller *et al.*, 2015; Bulman *et al.*, 2019). In our *in situ*  
548 experiments, *PbBSMT* mRNAs started to appear in small developing plasmodia (Suppl. Fig S6,  
549 S7). Small amounts of *PbBSMT* have been detected previously during early infection in EST  
550 (expressed sequence tag) libraries (Bulman *et al.*, 2006) and callus culture transcriptome  
551 analyses (Bulman *et al.*, 2011). We observed mRNAs of *PbBSMT* in small plasmodia, which  
552 appear to move from cell to cell (Suppl. Fig. S7). There is anecdotal evidence that plasmodia  
553 can move from cell to cell using cell wall breaks or plasmodesmata (Mühlenberg *et al.*, 2003;  
554 Donald *et al.*, 2008; Riascos *et al.*, 2011), but our results are the first to show that this movement  
555 is linked to the expression of a putative effector that alters the host defence response.

556 Using FISH we clearly demonstrate, that *PbBSMT* mRNAs start to increase when *P. brassicae*  
557 transitions from plasmodial growth to resting spore formation. The detected mRNAs peaked  
558 when young, immature resting spores became recognisable (Fig. 3). These results again confirm  
559 findings from previous studies (Ludwig-Müller *et al.*, 2015; Bulman *et al.*, 2019), but our  
560 results are the first to pinpoint these changes to specific life cycle stages. Notably *PbBSMT*  
561 mRNAs accumulate around the developing resting spores in the sporogenic plasmodia (Fig. 3,  
562 Suppl. Video 1). This accumulation of *PbBSMT* mRNAs around the developing resting spores  
563 is striking, because during spore formation chitin is produced (Cavalier-Smith & Chao, 2003;  
564 Schwelm *et al.*, 2015), which is one of the best studied elicitors of plant defence and induces

565 (amongst others) SA production (Fesel & Zuccaro, 2016). The results presented here therefore  
566 reinforce the previously established hypothesis that *PbBSMT* is produced to inactivate SA  
567 produced by the host in response to chitin (Ludwig-Müller *et al.*, 2015; Schwelm *et al.*, 2015).  
568 However, methylsalicylate (MeSA) is a more volatile and membrane-permeable form of SA  
569 and is either excreted via the leaves or an inducer of systemic responses in plants (Vlot *et al.*,  
570 2017). MeSA was specifically emitted from Arabidopsis leaves infected with *P. brassicae*  
571 (Ludwig-Müller *et al.*, 2015). Combined with findings from previous studies (Ludwig-Müller  
572 *et al.*, 2015; Bulman *et al.*, 2019), our observations strongly support the role in host defence  
573 suppression of *PbBSMT*, making it a very interesting target for future studies.

574 Therefore, we could confirm a direct interaction and interference of phytomyxids on the  
575 transcriptional status of infected cells using smFISH. Roots of brassicas infected with *P.*  
576 *brassicae* show a marked accumulation of starch (Ludwig-Müller *et al.*, 2009; Schuller &  
577 Ludwig-Müller, 2016). *MEX1*, a gene coding for a maltose transporter essential for transporting  
578 maltose from the amyloplast to the cytosol (Stettler *et al.*, 2009). With smFISH we could  
579 localise *MEX1* mRNAs in plant cells containing amyloplasts and plasmodia of *P. brassicae*  
580 (Suppl. Fig. S10). The presence of mRNAs is an indicator of ongoing synthesis of a host protein,  
581 because of the short half live of mRNAs in vivo (Merchante *et al.*, 2017). Therefore, it is likely  
582 that the MEX1 protein is activated by growing *P. brassicae* plasmodia to mediate energy supply  
583 from the host to the pathogen.

584 The brown algal *vBPO* has previously been linked to stress response (Leblanc *et al.*, 2015;  
585 Strittmatter *et al.*, 2016). Here we could confirm that *vBPO* mRNAs are located in *E. siliculosus*  
586 and *M. pyrifera* cells, which show early infections with *Maullinia ectocarpii*, while in cells  
587 where the infection has advanced to sporangial development no signals were identified. This  
588 confirms that brown algae, like plants, show a localised stress response to plasmodiophorid  
589 pathogens. Whether or not this type of stress response is a general pattern in brown algae or if  
590 this is specific for infections with phytomyxids was beyond the scope of this study.

591

592

### 593 **Acknowledgements**

594 JB and SN were funded by the Austrian Science Fund (FWF): grant Y801-B16 (START-grant).  
595 CG has received funding from the European Union's Horizon 2020 research and innovation  
596 programme under the Marie Skłodowska-Curie grant agreement No 642575, and from the UK  
597 NERC under the grant agreement GlobalSeaweed (NE/L013223/1). We thank Stefan Ciaghi  
598 for providing the transcriptomic data for *MEX1*. The authors want to thank Martin Kirchmair,  
599 Arne Schwelm, Mohammad Etemadi and Stefan Ciaghi for useful discussions.

600

### 601 **Author Contribution and References**

602 JB and SN designed the research, collected, analysed and interpreted data and wrote the  
603 manuscript with feedback from all co-authors; JB performed the research; CG provided algal  
604 material and algal data; AMS analysed the images. All authors read and contributed to the final  
605 MS.

606

607

- 608 **Archibald JM, Keeling PJ. 2004.** Actin and Ubiquitin Protein Sequences Support a  
609 Cercozoan/Foraminiferan Ancestry for the Plasmodiophorid Plant Pathogens. *Journal of*  
610 *Eukaryotic Microbiology* **51**(1): 113-118.
- 611 **Bruno L, Muto A, Spadafora ND, Iaria D, Chiappetta A, Van Lijsebettens M, Bitonti MB. 2011.** Multi-  
612 probe in situ hybridization to whole mount Arabidopsis seedlings. *International Journal of*  
613 *Developmental Biology* **55**(2): 197-203.
- 614 **Bulman S, Candy JM, Fiers M, Lister R, Conner AJ, Eady CC. 2011.** Genomics of Biotrophic, Plant-  
615 infecting Plasmodiophorids Using In Vitro Dual Cultures. *Protist* **162**(3): 449-461.
- 616 **Bulman S, Richter F, Marschollek S, Benade F, Julke S, Ludwig-Muller J. 2019.** Arabidopsis thaliana  
617 expressing PbBSMT, a gene encoding a SABATH-type methyltransferase from the plant  
618 pathogenic protist Plasmodiophora brassicae, show leaf chlorosis and altered host  
619 susceptibility. *Plant Biol (Stuttg)* **21 Suppl 1**: 120-130.
- 620 **Bulman S, Siemens J, Ridgway HJ, Eady C, Conner AJ. 2006.** Identification of genes from the obligate  
621 intracellular plant pathogen, Plasmodiophora brassicae. *FEMS microbiology letters* **264**(2):  
622 198-204.
- 623 **Buxbaum AR, Haimovich G, Singer RH. 2015.** In the right place at the right time: visualizing and  
624 understanding mRNA localization. *Nature Reviews Molecular Cell Biology* **16**(2): 95-109.
- 625 **Cavalier-Smith T, Chao EY. 2003.** Phylogeny of choanozoa, apusozoa, and other protozoa and early  
626 eukaryote megaevolution. *Journal of Molecular Evolution* **56**(5): 540-563.
- 627 **Chen KH, Boettiger AN, Moffitt JR, Wang SY, Zhuang XW. 2015.** Spatially resolved, highly multiplexed  
628 RNA profiling in single cells. *Science* **348**(6233).
- 629 **Cormier A, Avia K, Sterck L, Derrien T, Wucher V, Andres G, Monsoor M, Godfroy O, Lipinska A,  
630 Perrineau MM, et al. 2016.** Re-annotation, improved large-scale assembly and establishment  
631 of a catalogue of noncoding loci for the genome of the model brown alga Ectocarpus. *New*  
632 *Phytologist* **214**(1): 219-232.
- 633 **Cosse A, Potin P, Leblanc C. 2009.** Patterns of gene expression induced by oligoguluronates reveal  
634 conserved and environment-specific molecular defense responses in the brown alga Laminaria  
635 digitata. *New Phytologist* **182**(1): 239-250.
- 636 **Ding Y, Tang Y, Kwok CK, Zhang Y, Bevilacqua PC, Assmann SM. 2013.** In vivo genome-wide profiling  
637 of RNA secondary structure reveals novel regulatory features. *Nature* **505**: 696.
- 638 **Donald EC, Jaudzems G, Porter IJ. 2008.** Pathology of cortical invasion by Plasmodiophora brassicae in  
639 clubroot resistant and susceptible Brassica oleracea hosts. *Plant Pathology* **57**(2): 201-209.
- 640 **Duncan S, Olsson TSG, Hartley M, Dean C, Rosa S. 2016a.** A method for detecting single mRNA  
641 molecules in Arabidopsis thaliana. *Plant Methods* **12**: 13.
- 642 **Duncan S, Olsson TSG, Hartley M, Dean C, Rosa S. 2016b.** A method for detecting single mRNA  
643 molecules in Arabidopsis thaliana. *Plant Methods* **12**.
- 644 **Egan S, Harder T, Burke C, Steinberg P, Kjelleberg S, Thomas T. 2013.** The seaweed holobiont:  
645 understanding seaweed–bacteria interactions. *FEMS Microbiol Rev* **37**(3): 462-476.
- 646 **Farnham G, Strittmatter M, Coelho S, Cock JM, Brownlee C. 2013.** Gene silencing in Fucus embryos:  
647 developmental consequences of RNAi-mediated cytoskeletal disruption. *J Phycol* **49**(5): 819-  
648 829.
- 649 **Fesel PH, Zuccaro A. 2016.** beta-glucan: Crucial component of the fungal cell wall and elusive MAMP  
650 in plants. *Fungal Genetics and Biology* **90**: 53-60.
- 651 **Foley SW, Kramer MC, Gregory BD. 2017.** RNA structure, binding, and coordination in Arabidopsis.  
652 *Wiley Interdisciplinary Reviews: RNA* **8**(5): e1426.
- 653 **Francoz E, Ranocha P, Pernot C, Le Ru A, Pacquit V, Dunand C, Burlat V. 2016.** Complementarity of  
654 medium-throughput in situ RNA hybridization and tissue-specific transcriptomics: case study  
655 of Arabidopsis seed development kinetics. *Scientific Reports* **6**.
- 656 **Gaspar I, Ephrussi A. 2015.** Strength in numbers: quantitative single-molecule RNA detection assays.  
657 *Wiley Interdisciplinary Reviews: Developmental Biology* **4**(2): 135-150.

- 658 **Irani S, Trost B, Waldner M, Nayidu N, Tu J, Kusalik AJ, Todd CD, Wei Y, Bonham-Smith PC. 2018.**  
659 Transcriptome analysis of response to Plasmodiophora brassicae infection in the Arabidopsis  
660 shoot and root. *BMC genomics* **19**(1): 23.
- 661 **Kemen E, Jones JDG. 2012.** Obligate biotroph parasitism: can we link genomes to lifestyles? *Trends*  
662 *Plant Sci* **17**(8): 448-457.
- 663 **Leblanc C, Vilter H, Fournier JB, Delage L, Potin P, Rebuffet E, Michel G, Solari PL, Feiters MC, Czjzek**  
664 **M. 2015.** Vanadium haloperoxidases: From the discovery 30 years ago to X-ray crystallographic  
665 and V K-edge absorption spectroscopic studies. *Coordination Chemistry Reviews* **301**: 134-146.
- 666 **Lee C, Roberts SE, Gladfelter AS. 2016.** Quantitative spatial analysis of transcripts in multinucleate cells  
667 using single-molecule FISH. *Methods* **98**: 124-133.
- 668 **Libault M, Pingault L, Zogli P, Schiefelbein J. 2017.** Plant Systems Biology at the Single-Cell Level.  
669 *Trends in Plant Science* **22**(11): 949-960.
- 670 **Ludwig-Müller J, Prinsen E, Rolfe SA, Scholes JD. 2009.** Metabolism and plant hormone action during  
671 clubroot disease. *Journal of Plant Growth Regulation* **28**(3): 229-244.
- 672 **Ludwig-Müller J, Jülke S, Geiß K, Richter F, Mithöfer A, Šola I, Rusak G, Keenan S, Bulman S. 2015.** A  
673 novel methyltransferase from the intracellular pathogen Plasmodiophora brassicae  
674 methylates salicylic acid. *Molecular Plant Pathology* **16**(4): 349-364.
- 675 **Maier I, Parodi E, Westermeier R, Muller DG. 2000.** Maullinia ectocarpii gen. et sp. nov.  
676 (Plasmodiophorea), an intracellular parasite in Ectocarpus siliculosus (Ectocarpales,  
677 Phaeophyceae) and other filamentous brown algae. *Protist* **151**(3): 225-238.
- 678 **Medioni C, Besse F 2018.** The Secret Life of RNA: Lessons from Emerging Methodologies. In: Gaspar I  
679 ed. *RNA Detection: Methods and Protocols*. New York, NY: Springer New York, 1-28.
- 680 **Merchante C, Stepanova AN, Alonso JM. 2017.** Translation regulation in plants: an interesting past,  
681 an exciting present and a promising future. *The Plant Journal* **90**(4): 628-653.
- 682 **Misra BB, Assmann SM, Chen SX. 2014.** Plant single-cell and single-cell-type metabolomics. *Trends*  
683 *Plant Sci* **19**(10): 637-646.
- 684 **Moor AE, Itzkovitz S. 2017.** Spatial transcriptomics: paving the way for tissue-level systems biology.  
685 *Current Opinion in Biotechnology* **46**: 126-133.
- 686 **Mühlenberg I, Schuller A, Siemens J, Kobelt P, Ludwig-Müller J. 2003.** Plasmodiophora brassicae, the  
687 causal agent of clubroot disease, may penetrate plant cell walls via cellulase. *PLANT*  
688 *PROTECTION SCIENCE-PRAGUE-* **38**: 69-72.
- 689 **Müller DB, Vogel C, Bai Y, Vorholt JA. 2016.** The Plant Microbiota: Systems-Level Insights and  
690 Perspectives. *Annu Rev Genet* **50**(1): 211-234.
- 691 **Murúa P, Goecke F, Westermeier R, van West P, Kupper FC, Neuhauser S. 2017.** Maullinia braseltonii  
692 sp nov (Rhizaria, Phytomyxea, Phagomyxida): A Cyst-forming Parasite of the Bull Kelp  
693 Durvillaea spp. (Stramenopila, Phaeophyceae, Fucales). *Protist* **168**(4): 468-480.
- 694 **Neuhauser S, Huber L, Kirchmair M. 2011.** Is Roesleria subterranea a primary pathogen or a minor  
695 parasite of grapevines? Risk assessment and a diagnostic decision scheme. *European Journal*  
696 *of Plant Pathology* **130**(4): 503-510.
- 697 **Niessing D, Jansen RP, Pohlmann T, Feldbrugge M. 2018.** mRNA transport in fungal top models. *Wiley*  
698 *Interdisciplinary Reviews-Rna* **9**(1).
- 699 **Riascos D, Ortiz E, Quintero D, Montoya L, Hoyos-Carvajal L. 2011.** Histopathological and  
700 morphological alterations caused by plasmodiophora brassicae in brassica oleracea  
701 *Agronomía Colombiana* **29**: 57-67.
- 702 **Rolfe SA, Strelkov SE, Links MG, Clarke WE, Robinson SJ, Djavaheri M, Malinowski R, Haddadi P,**  
703 **Kagale S, Parkin IA. 2016.** The compact genome of the plant pathogen Plasmodiophora  
704 brassicae is adapted to intracellular interactions with host Brassica spp. *BMC Genomics* **17**(1):  
705 272.
- 706 **Schneider CA, Rasband WS, Eliceiri KW. 2012.** NIH Image to ImageJ: 25 years of image analysis. *Nature*  
707 *Methods* **9**: 671.

- 708 **Schuller A, Kehr J, Ludwig-Muller J. 2014.** Laser microdissection coupled to transcriptional profiling of  
709 Arabidopsis roots inoculated by *Plasmodiophora brassicae* indicates a role for brassinosteroids  
710 in clubroot formation. *Plant and Cell Physiology* **55**(2): 392-411.
- 711 **Schuller A, Ludwig-Müller J. 2016.** Histological methods to detect the clubroot pathogen  
712 *Plasmodiophora brassicae* during its complex life cycle. *Plant Pathology* **65**(8): 1223-1237.
- 713 **Schwelm A, Badstöber J, Bulman S, Desoignies N, Etemadi M, Falloon RE, Gachon CMM, Legreve A,  
714 Lukeš J, Merz U, et al. 2018.** Not in your usual Top 10: protists that infect plants and algae.  
715 *Molecular Plant Pathology* **19**(4): 1029-1044.
- 716 **Schwelm A, Fogelqvist J, Knaust A, Jülke S, Lilja T, Bonilla-Rosso G, Karlsson M, Shevchenko A,  
717 Dhandapani V, Choi SR. 2015.** The *Plasmodiophora brassicae* genome reveals insights in its life  
718 cycle and ancestry of chitin synthases. *Scientific Reports* **5**: 11153.
- 719 **Singh K, Tzelepis G, Zouhar M, Ryšánek P, Dixelius C. 2018.** The immunophilin repertoire of  
720 *Plasmodiophora brassicae* and functional analysis of PbCYP3 cyclophilin. *Molecular Genetics  
721 and Genomics* **293**(2): 381-390.
- 722 **Stettler M, Eicke S, Mettler T, Messerli G, Hortensteiner S, Zeeman SC. 2009.** Blocking the metabolism  
723 of starch breakdown products in Arabidopsis leaves triggers chloroplast degradation. *Mol  
724 Plant* **2**(6): 1233-1246.
- 725 **Strittmatter M, Grenville-Briggs LJ, Breithut L, Van West P, Gachon CM, Kupper FC. 2016.** Infection of  
726 the brown alga *Ectocarpus siliculosus* by the oomycete *Eurychasma dicksonii* induces oxidative  
727 stress and halogen metabolism. *Plant Cell Environ* **39**(2): 259-271.
- 728 **Trcek T, Lionnet T, Shroff H, Lehmann R. 2017.** mRNA quantification using single-molecule FISH in  
729 *Drosophila* embryos. *Nature Protocols* **12**(7): 1326-1348.
- 730 **van Gijtenbeek LA, Kok J. 2017.** Illuminating Messengers: An Update and Outlook on RNA Visualization  
731 in Bacteria. *Frontiers in Microbiology* **8**: 1-19.
- 732 **Vandenkoornhuysen P, Quaiser A, Duhamel M, Le Van A, Dufresne A. 2015.** The importance of the  
733 microbiome of the plant holobiont. *New Phytologist* **206**(4): 1196-1206.
- 734 **Vlot AC, Pabst E, Riedlmeier M. 2017.** Systemic Signalling in Plant Defence. *eLS*.
- 735 **Wang DJ, Bodovitz S. 2010.** Single cell analysis: the new frontier in 'omics'. *Trends in Biotechnology*  
736 **28**(6): 281-290.
- 737 **Weibrecht I, Lundin E, Kiflemariam S, Mignardi M, Grundberg I, Larsson C, Koos B, Nilsson M,  
738 Soderberg O. 2013.** In situ detection of individual mRNA molecules and protein complexes or  
739 post-translational modifications using padlock probes combined with the in situ proximity  
740 ligation assay. *Nat Protoc* **8**(2): 355-372.
- 741 **West JA, McBride DL. 1999.** Long-term and diurnal carpospore discharge patterns in the Ceramiaceae,  
742 Rhodomelaceae and Delesseriaceae (Rhodophyta). *Hydrobiologia* **398**(0): 101-114.
- 743 **Ye N, Zhang X, Miao M, Fan X, Zheng Y, Xu D, Wang J, Zhou L, Wang D, Gao Y, et al. 2015.** Saccharina  
744 genomes provide novel insight into kelp biology. *Nature Communications* **6**: 6986.
- 745 **Zeilinger S, Gupta VK, Dahms TES, Silva RN, Singh HB, Upadhyay RS, Gomes EV, Tsui CKM, Nayak SC,  
746 van der Meer JR. 2016.** Friends or foes? Emerging insights from fungal interactions with plants.  
747 *FEMS Microbiol Rev* **40**(2): 182-207.
- 748
